# Supplementary figures and images for: Decoupling the impact of microRNAs on translational repression versus RNA degradation in embryonic stem cells
Source: eLife journal article supplement (doi:10.7554/elife.38014), 2018-07-25

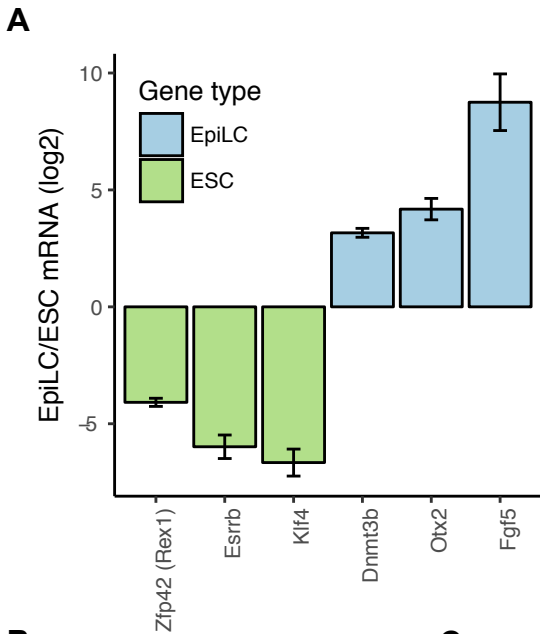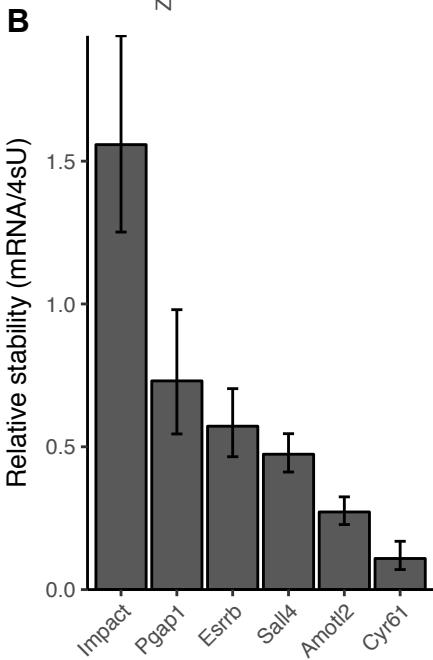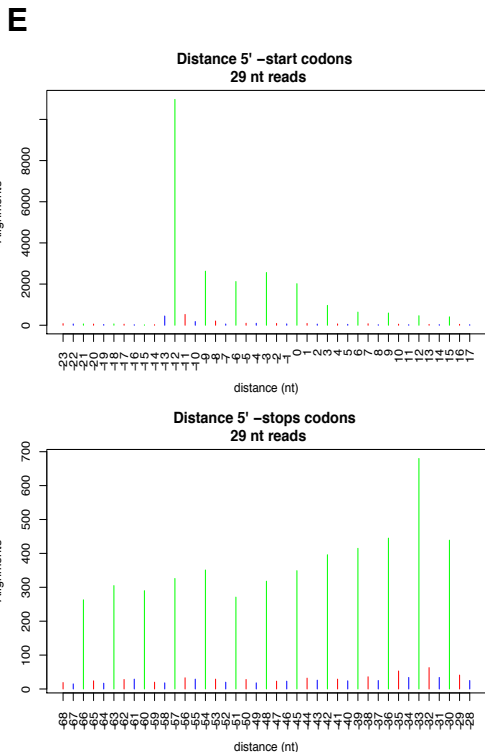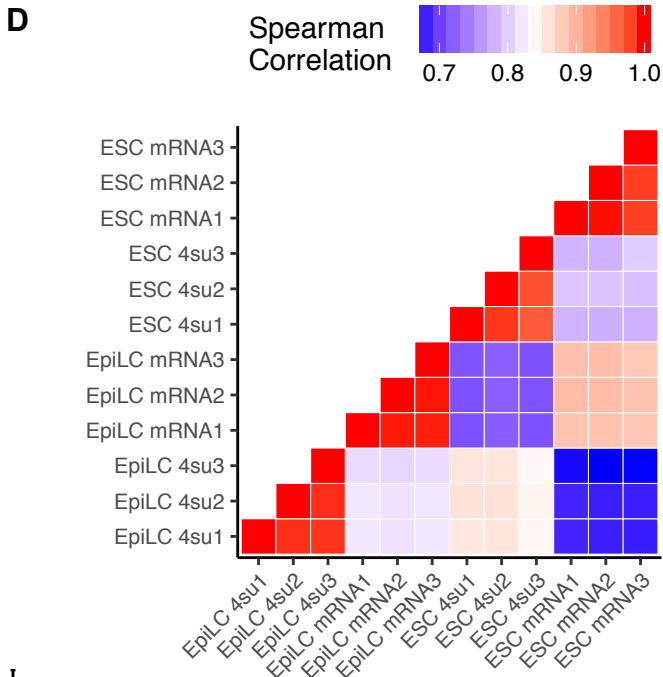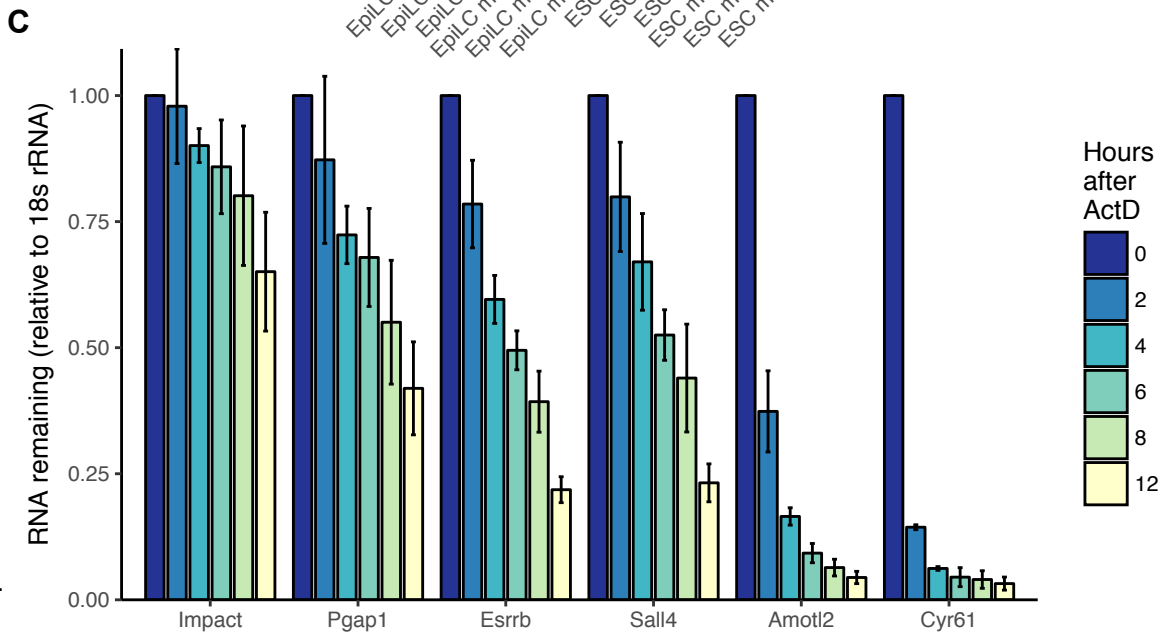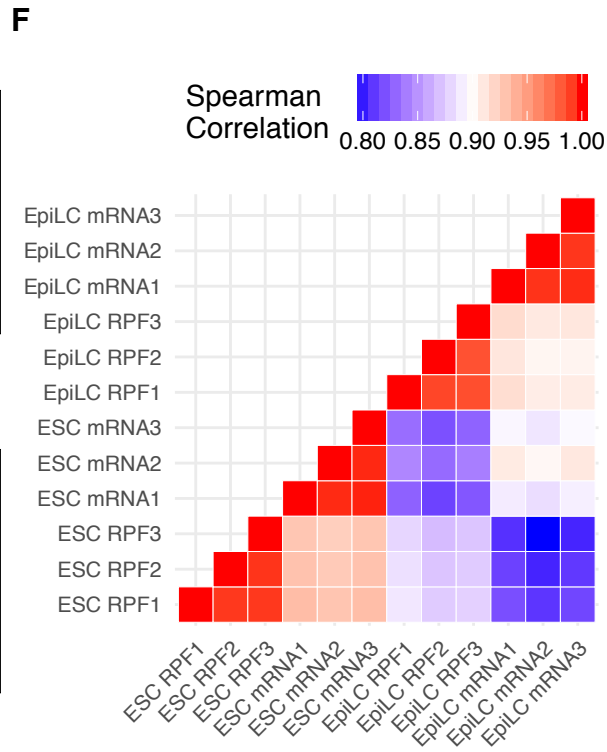

Supplement: supp [file elife_poa_e38014_Figure_1_figure_supplement_1.pdf › elife_poa_e38014_Figure_1_figure_supplement_1.pdf]

**A**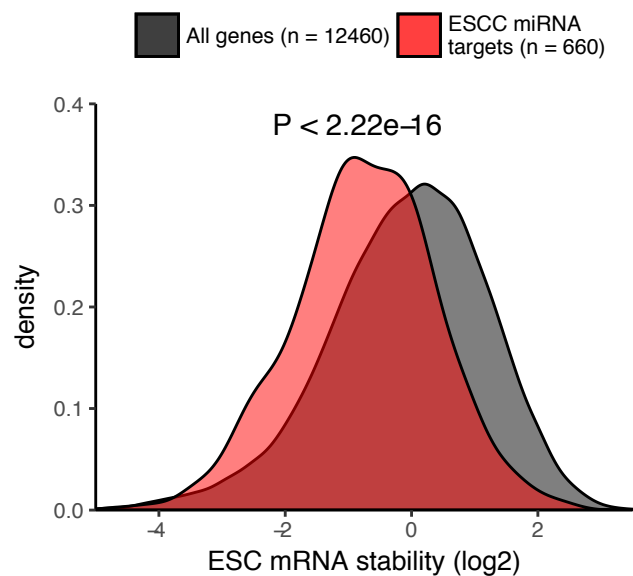**B**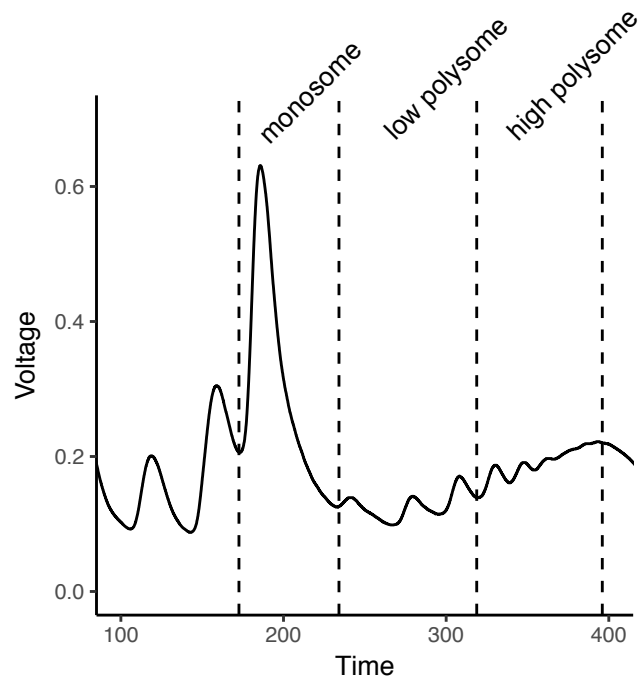**C**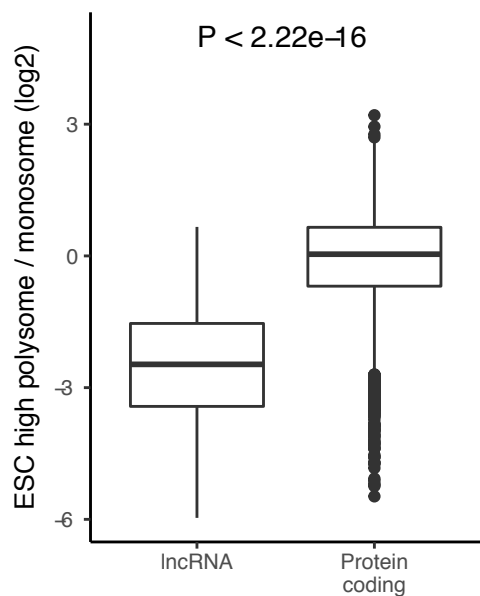**D**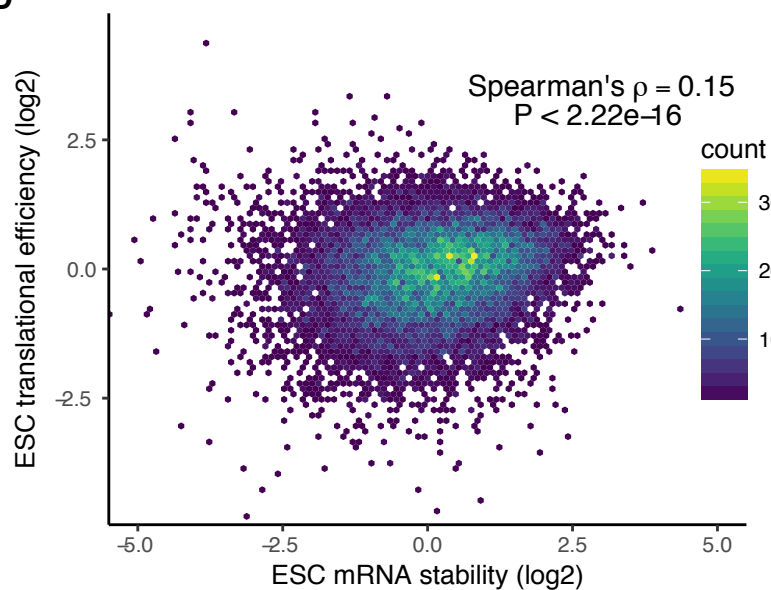**E**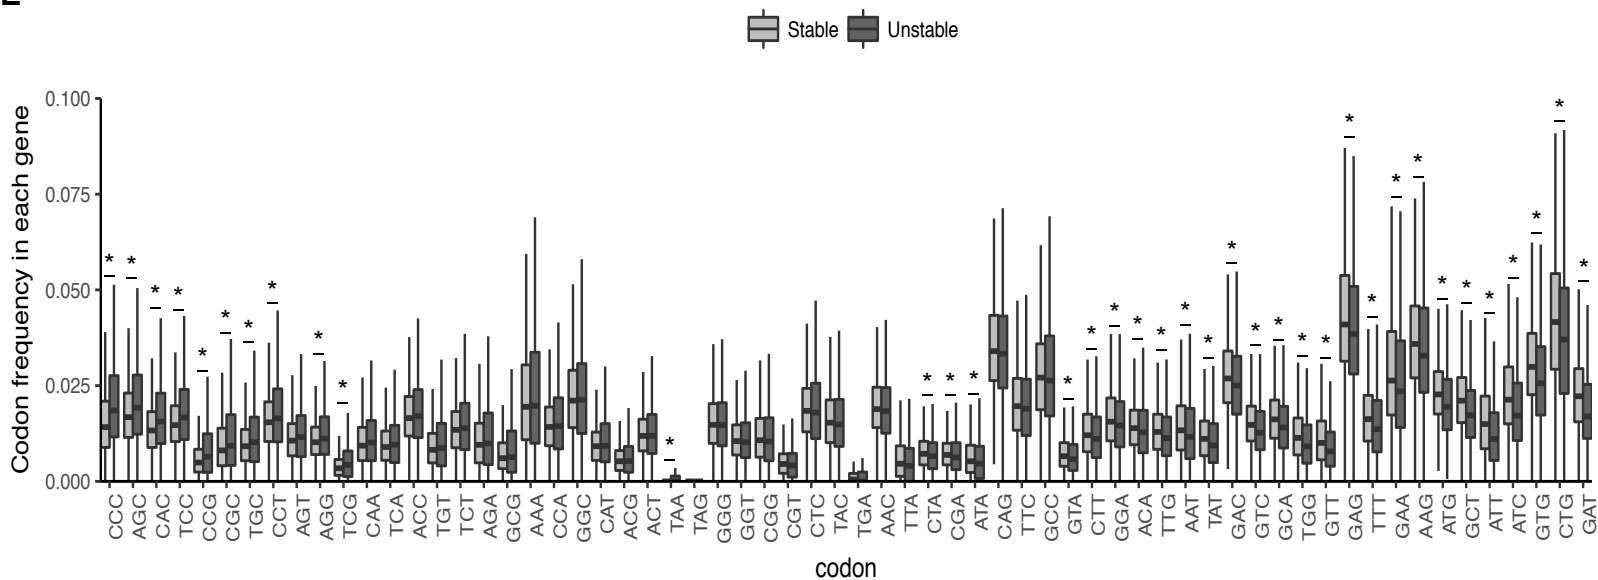

Supplement: supp [file elife_poa_e38014_Figure_2_figure_supplement_1.pdf › elife_poa_e38014_Figure_2_figure_supplement_1.pdf]

A

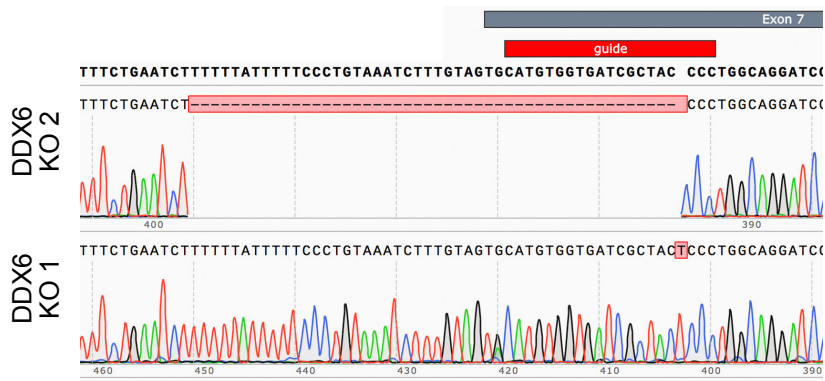

Supplement: supp [file elife_poa_e38014_Figure_3_figure_supplement_1.pdf › elife_poa_e38014_Figure_3_figure_supplement_1.pdf]

**A**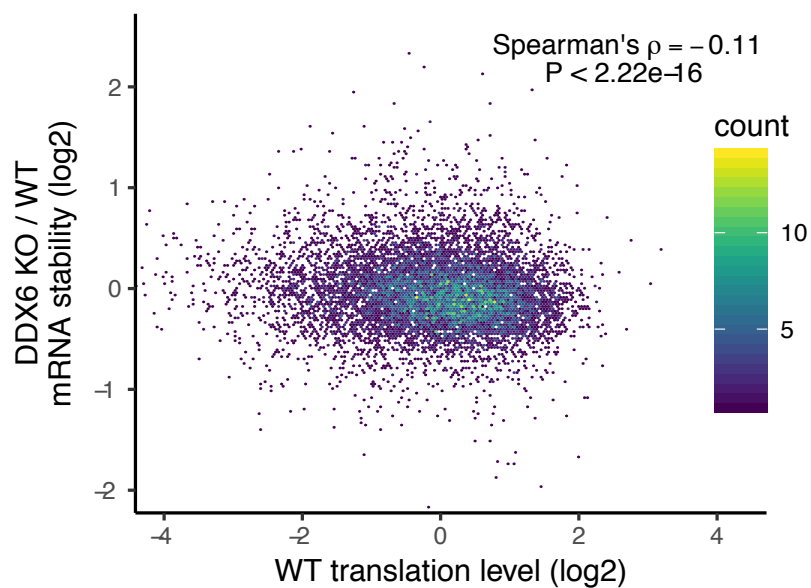**B**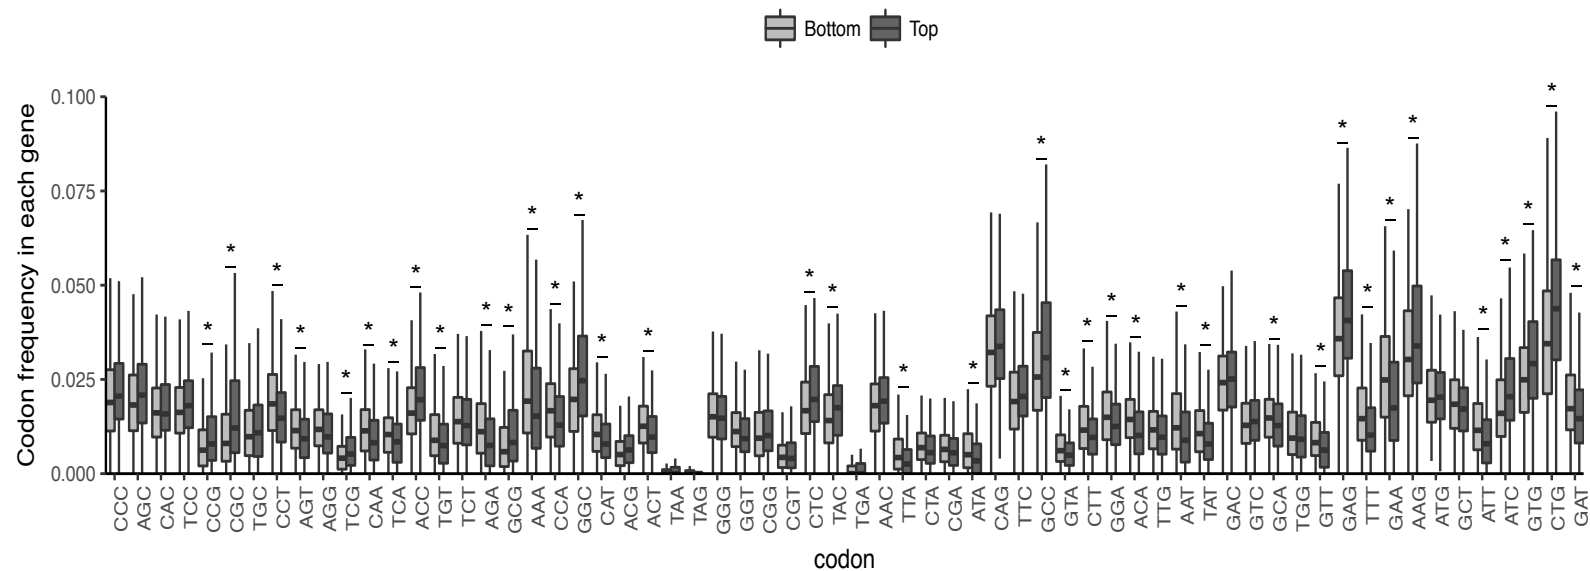**C**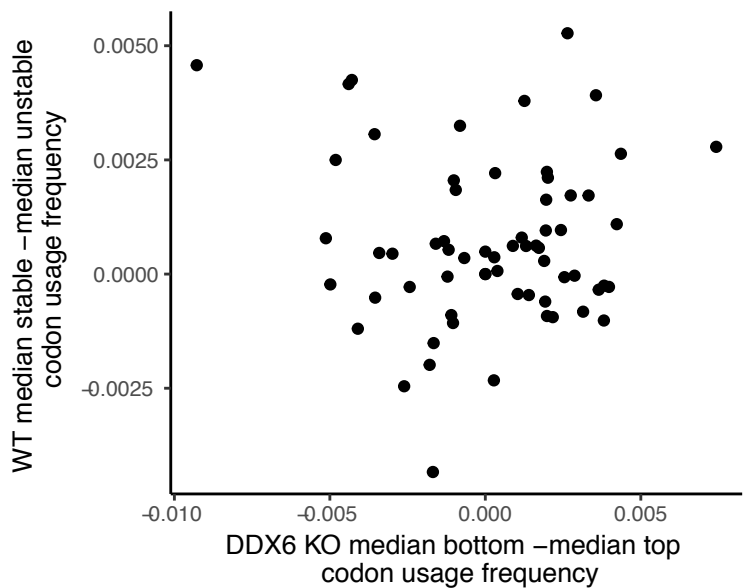**D**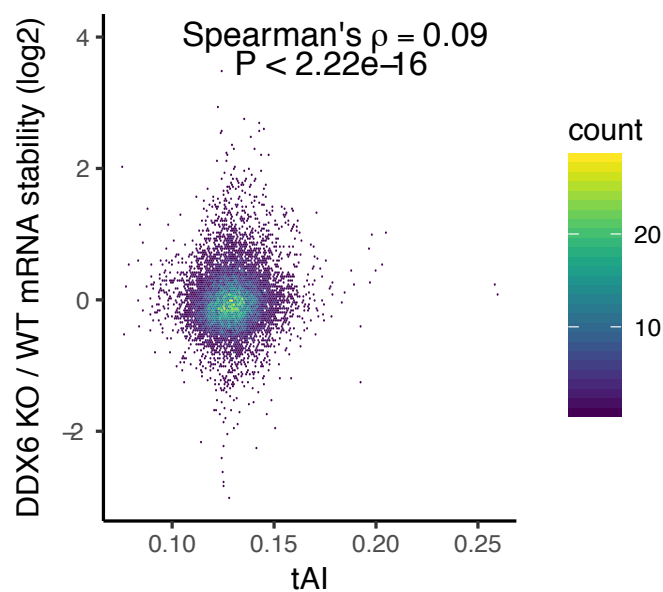

Supplement: supp [file elife_poa_e38014_Figure_4_figure_supplement_1.pdf › elife_poa_e38014_Figure_4_figure_supplement_1.pdf]

**A**

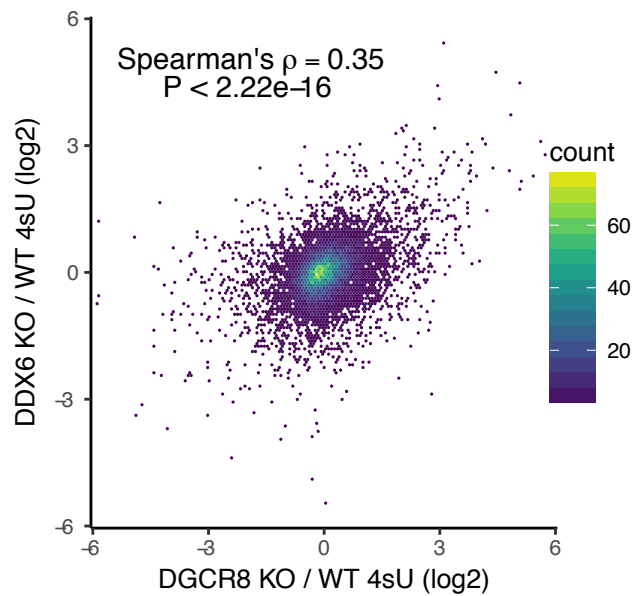

Supplement: supp [file elife_poa_e38014_Figure_5_figure_supplement_1.pdf › elife_poa_e38014_Figure_5_figure_supplement_1.pdf]
